# Supplementary material
Source: HighWire-hosted journal article supplement (https://cmaj.ca/highwire/filestream/58268/field_highwire_adjunct_files/0/image-cheng-1-at.pdf)

**Appendix 1:** A microscopic section of a carotid body paraganglioma of a 42-year-old man. The section shows multiple clustered nests (arrows) of chief cells, called zellballen, surrounded by a thin rim of sustentacular cells in a fibrovascular stroma (hematoxylin–eosin, original magnification  $\times 400$ ).

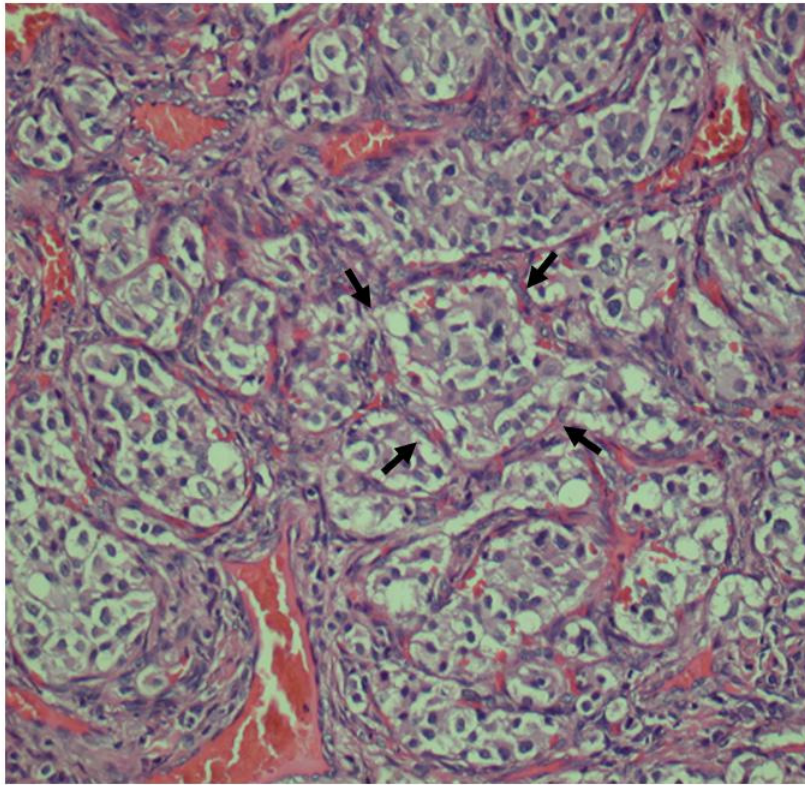

Supplement: image-cheng-1-at.pdf [file image-cheng-1-at.pdf]
